# Supplementary material for: Relationship between electron–phonon interaction and low-frequency Raman anisotropy in high-mobility organic semiconductors
Source: Royal Society of Chemistry journal article supplement (doi:10.1039/c8cp03232g), 2018-01-01
Supplement: c8cp03232g1.pdf [file c8cp03232g1.pdf]

## Relationship between electron-phonon interaction and low-frequency

### Raman anisotropy in high-mobility organic semiconductors

*A. Yu. Sosorev<sup>1</sup>, D. Maslennikov<sup>1</sup>, I. Yu. Chernyshov<sup>2</sup>, D. I. Dominskiy<sup>1</sup>, V. V. Bruevich<sup>1</sup>, M. V. Vener<sup>2</sup>, D. Yu. Paraschuk<sup>1</sup>*

<sup>1</sup>Faculty of Physics and International Laser Center, M.V. Lomonosov Moscow State University, Moscow 119991, Russia

<sup>2</sup>Department of Quantum Chemistry, Mendeleev University of Chemical Technology, Miusskaya Square 9, Moscow 125047, Russia

### Supporting information

#### 1. Computational and experimental details

##### Computational

Normal vibrational modes (in  $\Gamma$ -point) were calculated within the harmonic approximation by numerical differentiation of the energy gradient with respect to atomic position.<sup>1</sup> The D2 semiempirical Grimme dispersion correction<sup>2</sup> has practically no impact on the intermolecular distances and the mode character.<sup>3,4</sup>

The transfer integrals  $J$  were calculated using home-written code based on dimer projection method (DIPRO).<sup>5</sup> To estimate this quantity for a pair (dimer) of molecules (monomers)  $m$  and  $n$ ,  $J_{mn}$ , the wavefunctions of these molecules were approximated by their lowest unoccupied molecular orbitals (LUMOs),  $\phi_m$  and  $\phi_n$ . The latter were written in the basis of the dimer molecular orbitals  $\phi_i$ :

$$J_{mn} = \langle \phi_m | H | \phi_n \rangle = \sum_i \sum_j \langle \phi_m | \phi_i \rangle \langle \phi_i | H | \phi_j \rangle \langle \phi_j | \phi_n \rangle \approx \sum_i \langle \phi_m | \phi_i \rangle E_i \langle \phi_i | \phi_n \rangle \quad (\text{S1})$$

where  $E_i$  are the energies of  $\phi_i$ . Projections of monomer LUMOs on dimer orbitals,  $\langle \phi_m | \phi_i \rangle$  and  $\langle \phi_i | \phi_n \rangle$ , were calculated from the corresponding coefficients in the basis of atomic orbitals.

##### Experimental

*Crystal growth.* After the preliminary evacuation of the fused silica growth tube below  $2 \cdot 10^{-3}$  mbar, the powdered source material was heated at  $170^\circ\text{C}$ , sublimated molecules were transported by the carrier gas (by the flow of 4 sccm) to a lower temperature zone ( $\sim 150^\circ\text{C}$ ), where the crystals grew. The crystal growth time was 20 h. After the growth, the crystals were transferred onto glass substrates.

## 2. Charge transfer directions in crystalline TCNQ and F<sub>2</sub>-TCNQ

Table S1 lists the electron transfer integrals for various Dimers of TCNQ and F<sub>2</sub>-TCNQ calculated using Eq. S1 at B3LYP/6-31G(d) level (see Section 1). The molecules constituting the dimers are numbered in accordance with Figure 2a,b of the main text. The relative orientation of the molecules in dimers is illustrated in Figure S1. Figure S2 illustrates the lowest unoccupied molecular orbitals (LUMOs) patterns of TCNQ and F<sub>2</sub>-TCNQ single molecules and their selected dimers. Significant LUMO density between the molecules in the dimers illustrates considerable charge delocalization and strong electronic coupling (large  $J$ ) between them.

Table S1. Electron transfer integrals for TCNQ and F<sub>2</sub>-TCNQ crystals

| Dimer # | Molecules<br>(m-n) | Transfer integral $J_{mn}$ , meV |                      |
|---------|--------------------|----------------------------------|----------------------|
|         |                    | TCNQ                             | F <sub>2</sub> -TCNQ |
| 1       | 1-2                | 60                               | 75                   |
| 2       | 1-3                | 34                               | 54                   |
| 3       | 1-4                | 34                               | 75                   |
| 4       | 1-5                | 15                               | 54                   |
| 5       | 1-6                | 10                               | 12                   |
| 6       | 1-7                | 6                                | 5                    |
| 7       | 1-8                | 0.8                              | 0                    |

## TCNQ

**Dimer 1,  $J=60$  meV**

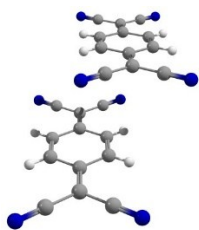

**Dimers 2 and 3,  $J=34$  meV**

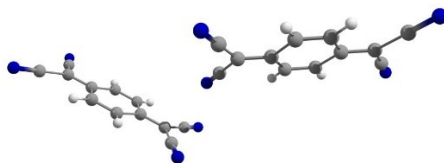

**Dimer 4,  $J=15$  meV**

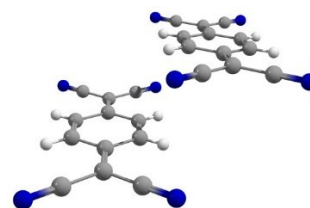

**Dimer 5,  $J=10$  meV**

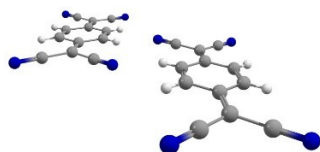

**Dimer 6,  $J=6$  meV**

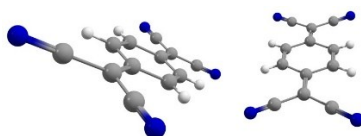

**Dimer 7,  $J=1$  meV**

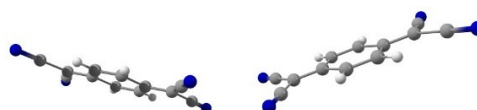

## F<sub>2</sub>-TCNQ

**Dimers 1 and 3,  $J=75$  meV**

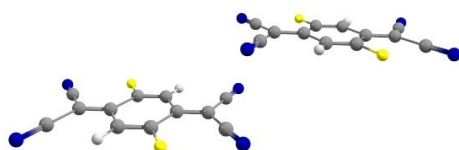

**Dimers 2 and 4,  $J=54$  meV**

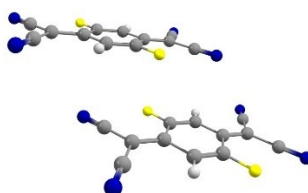

**Dimer 5,  $J=12$  meV**

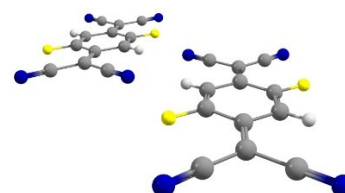

**Dimer 6,  $J=5$  meV**

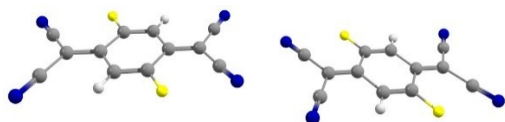

**Dimer 7,  $J=0$  meV**

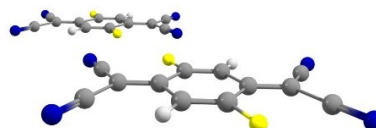

Figure S1. Dimers of TCNQ and F<sub>2</sub>-TCNQ from the X-ray data on single crystals.

a) TCNQ

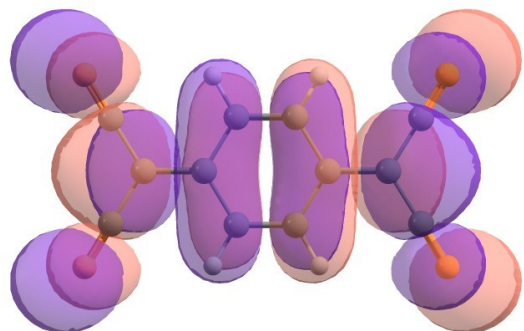

b) F<sub>2</sub>-TCNQ

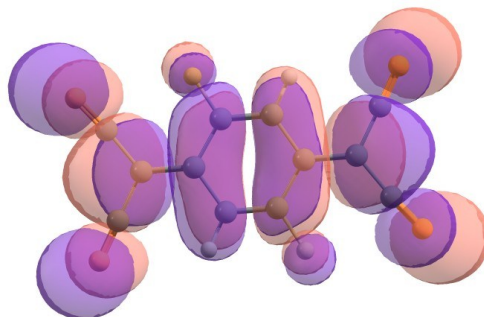

c) TCNQ, Dimer 1

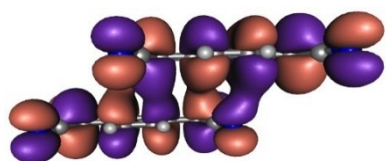

d) F<sub>2</sub>-TCNQ, Dimer 1

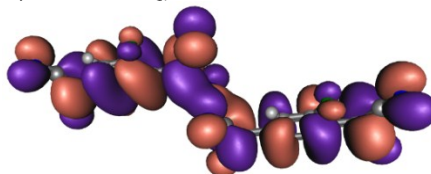

e) F<sub>2</sub>-TCNQ, Dimer 2

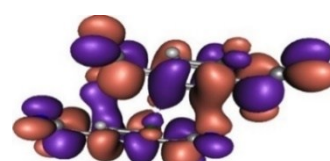

Figure S2. LUMOs of TCNQ (a) and F<sub>2</sub>-TCNQ (b) single molecules, Dimer 1 from TCNQ crystal (c), and Dimer 1 (d) and Dimer 2 (e) from F<sub>2</sub>-TCNQ crystal.

### 3. Impact of vibrations on charge transport in TCNQ and F<sub>2</sub>-TCNQ

#### 3.1. Overall non-local interaction in Dimer 1 and Dimer 2

Table S2 presents overall estimates of the non-local electron-phonon coupling,  $L^{mn} = \sum_i L_i^{mn}$ , for Dimers 1 and 2 of TCNQ and F<sub>2</sub>-TCNQ. It also shows the variance of the electron transfer integrals along the corresponding directions,  $\sigma_J$ , evaluated from  $L^{mn}$  values as<sup>6</sup>  $\sigma_J = \sqrt{2L^{mn}kT}$ , where  $k$  the Boltzman constant and  $T$  is the absolute temperature. In the last two columns, the ratio of  $\sigma_J$  to  $J_{mn}$  is given. The obtained  $\sigma_J/J_{mn}$  values are in correspondence with those obtained in Ref. [7] using molecular dynamics simulations with classical force field (see Table 2 therein).

Table S2.  $L^{mn}$  and  $\sigma_J$  for Dimers 1 and 2 of the TCNQ and F<sub>2</sub>-TCNQ crystals.

|         | $L^{mn}$ , meV |                      | $\sigma_J$ , meV |                      | $\sigma_J/J_{mn}$ , meV |                      |
|---------|----------------|----------------------|------------------|----------------------|-------------------------|----------------------|
|         | TCNQ           | F <sub>2</sub> -TCNQ | TCNQ             | F <sub>2</sub> -TCNQ | TCNQ                    | F <sub>2</sub> -TCNQ |
| Dimer 1 | 10.5           | 22.5                 | 22.9             | 33.5                 | 0.38                    | 0.45                 |
| Dimer 2 | 11.8           | 9.4                  | 24.3             | 21.7                 | 0.71                    | 0.40                 |

#### 3.2. Vibrational patterns

In crystalline TCNQ, for the charge transfer direction along the Dimer 2 axis, the largest  $L_i$  is for the mode at  $\sim 42$  cm<sup>-1</sup>. The corresponding vibrational pattern is given in Figure S3a,b. We suggest that large  $L_i$ <sup>13</sup> for this mode stems from its intramolecular part: this mode negligibly affects the distance between the contacting atoms but induces significant changes in the molecular geometry and hence electron density on CN<sup>2</sup> group determining  $J_{13}$ . Several other vibrational modes in the range 65-160 cm<sup>-1</sup> also show significant  $L_i$ <sup>13</sup>  $\sim 1$  meV. Considerable number of such modes results from the volatile  $\pi$ -overlapping of the monomers in Dimer 2 (see dotted line in Fig. S3b), which is provided by the contact of just one (N) atom of one monomer with the CN<sup>2</sup> group of the other.

In F<sub>2</sub>-TCNQ crystal, charge transfer along the Dimer 2 axis is most affected by the mode at  $\sim 82$  cm<sup>-1</sup>, which involves significant displacement of the CN<sup>1</sup> moiety with respect to the phenyl ring of the neighboring molecule (Figure S3d). Negligible impact of the latter mode on charge transfer along Dimer 1 axis stems from negligible relative displacement of CN<sup>2</sup> groups (Figure S3c).

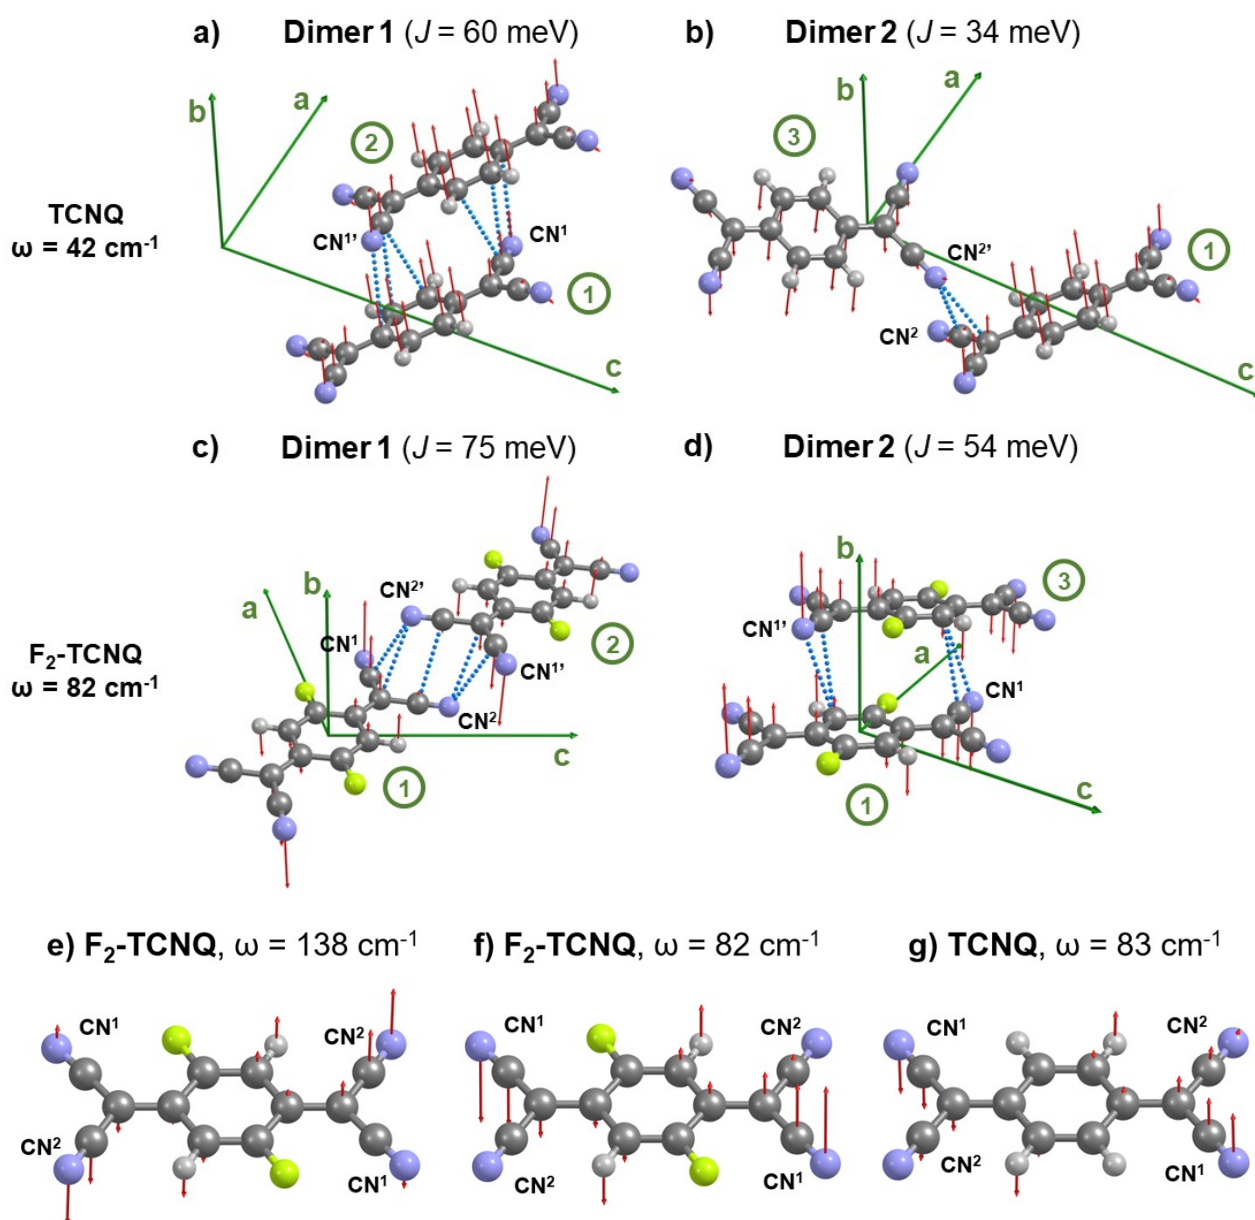

Figure S3. Vibrational patterns of selected modes of crystalline TCNQ and F<sub>2</sub>-TCNQ. Atomic displacements for the mode at  $42 \text{ cm}^{-1}$  in TCNQ crystal (a,b) and  $82 \text{ cm}^{-1}$  of F<sub>2</sub>-TCNQ crystal (c,d) are shown by red arrows within Dimer 1 (left) and Dimer 2 (right). The closest contacts (distances) between the atoms from different monomers (excluding hydrogens) are shown with blue dotted lines. Green arrows depict the crystal axes. Intramolecular vibrational patterns (relative atomic displacements within single molecules) are shown in panels e, f, g for modes at  $82$  and  $138 \text{ cm}^{-1}$  of crystalline F<sub>2</sub>-TCNQ and for mode  $83 \text{ cm}^{-1}$  of crystalline TCNQ, respectively.

### 3.3. Local electron-phonon coupling

Contribution of mode  $i$  to the local electron-phonon interaction can be estimated as:<sup>8</sup>

$$\lambda_i = \frac{\left(\frac{\partial \varepsilon_m}{\partial Q_i}\right)^2}{2m_i \omega_i^2} \quad (\text{S2}),$$

where  $\varepsilon_m$  is the energy of the frontier molecular level (HOMO or LUMO for hole and electron transport, respectively). These contributions for various LF vibrational modes of TCNQ and F<sub>2</sub>-TCNQ are shown in Figure S4.

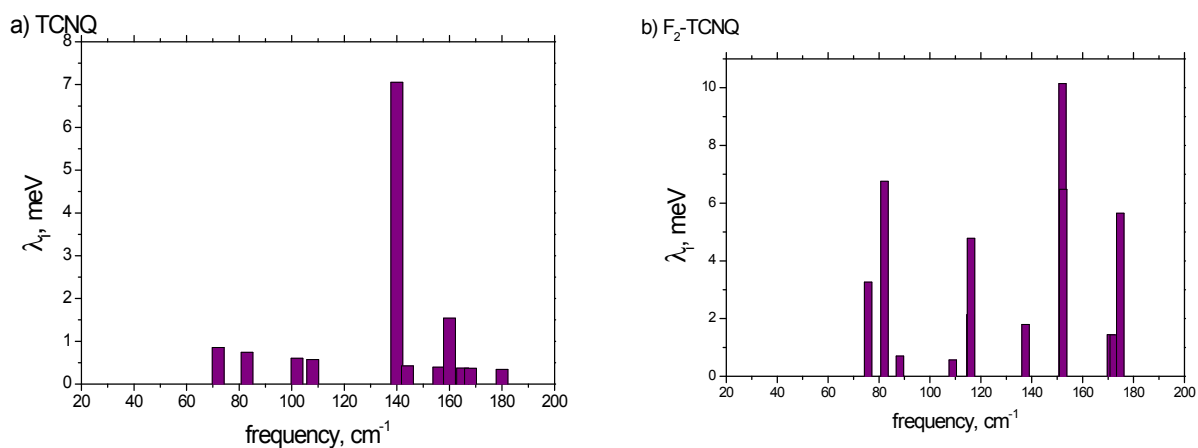

Figure S4. Contribution of various LF vibrational modes to local electron-phonon interaction for TCNQ (a) and F<sub>2</sub>-TCNQ (b)

## 4. Correlation between the Raman anisotropy and contribution to electron-phonon coupling

### 4.1. Molecular packing in the plane parallel to upper crystal face

Projections of the dimers axes (the straight line linking the centers of the monomers) on the plane of the upper crystal face are important for our analysis of the Raman anisotropy, since the pump laser was polarized in this plane. TCNQ crystal consists of layers, in which molecules are parallel to each other. These layers are parallel to the (001) crystal plane – the upper crystal face in our experiments – as depicted in Figure S5a. In subsequent layers, the molecular packing alternates as shown in Figure S5b,c. As a result, in TCNQ, for a given dimer type (e.g., Dimer 1), projections of the dimers axes from subsequent layers on the upper crystal face are nearly perpendicular as shown in Figure S6a. On the contrary, in F<sub>2</sub>-TCNQ, all the molecules are oriented similarly, and thus all dimers of the given type show the same projection on the upper crystal face as shown in Figure S6b.

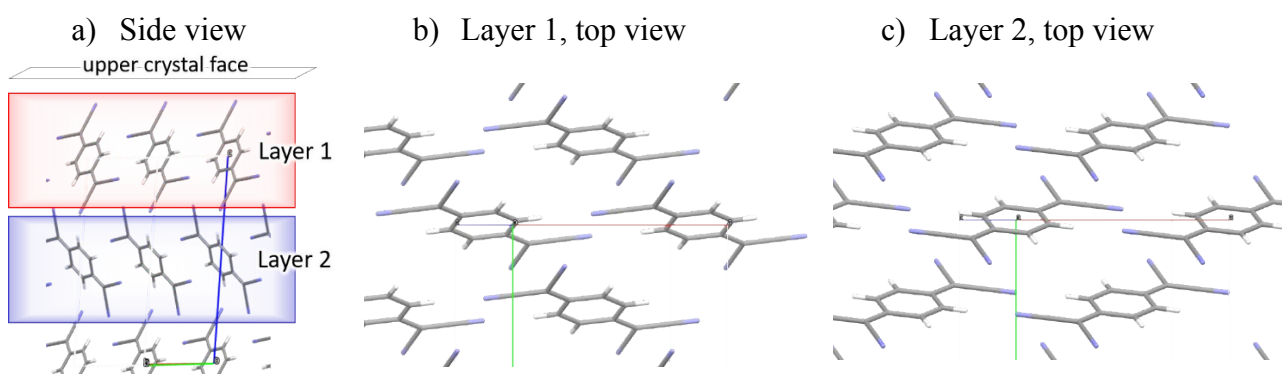

Figure S5. Molecular packing in two subsequent layers of the (001) plane of TCNQ crystal.

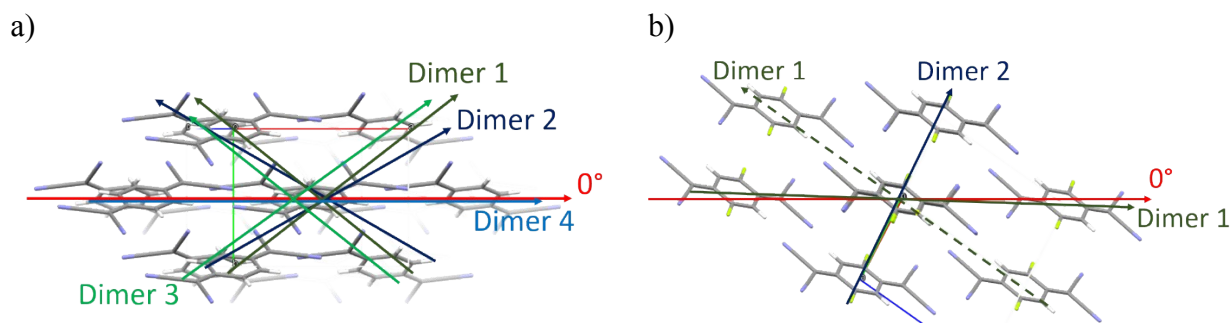

Figure S6. Molecular packing and projections of the dimer axes on the upper face of the investigated crystals (arrows): (001) plane of TCNQ crystal (a) and (110) plane of F<sub>2</sub>-TCNQ crystal.



## 4.2. Raman spectra at different angles and their relation to non-local electron-phonon interaction

In TCNQ and F<sub>2</sub>-TCNQ crystals, the relative intensities of the peaks vary with  $\theta$  (Figure S8). Specifically, for TCNQ, new peaks at  $\sim 60$ , 100 and 145 cm<sup>-1</sup> emerge for  $\theta=90^\circ$ . In F<sub>2</sub>-TCNQ, new peaks at  $\sim 110$  and 170 cm<sup>-1</sup> arise for  $\theta=90^\circ$ . We suggest these peaks were not visible at  $\theta=0^\circ$  since their contribution to *local* electron-phonon interaction is negligible (Figure S4); their emergence at  $90^\circ$  can be explained by the contribution to *non-local* electron-phonon interaction (Figure 2b), and local electron-phonon interaction does not obscure them in the latter direction.

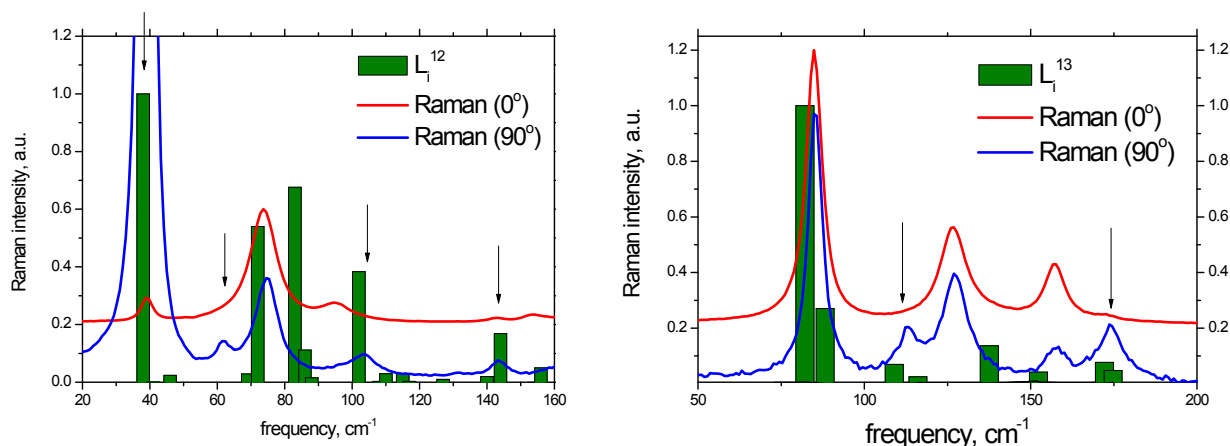

Figure S7. Correlation between the experimental Raman spectra (lines) and calculated contributions of vibrational modes to non-local electron-phonon coupling (bars) for TCNQ (left) and F<sub>2</sub>-TCNQ (right). Arrows mark the modes not observed at  $\theta=0^\circ$  but observed at  $\theta=90^\circ$

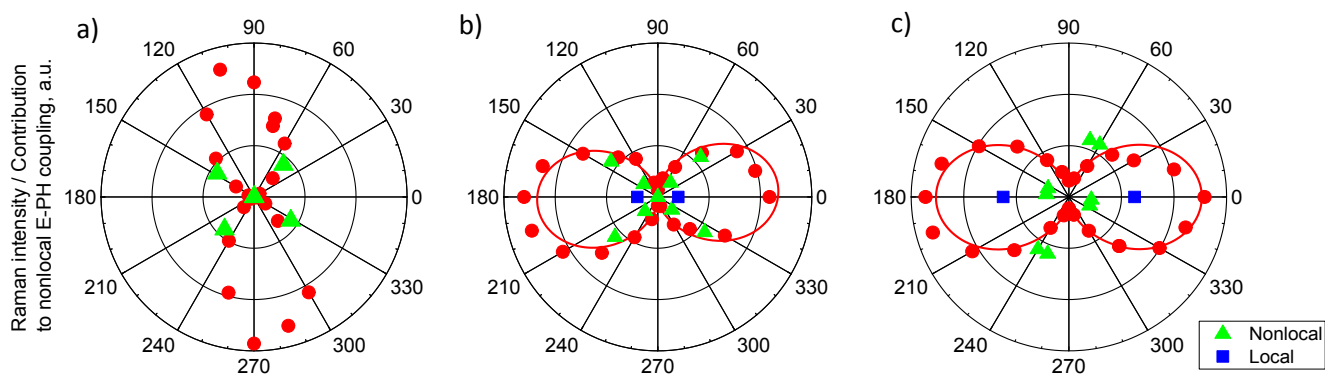

Figure S8. Relationship between Raman anisotropy (circles) and non-local (triangles) and local (squares) electron-phonon coupling. (a) TCNQ, mode at 40 cm<sup>-1</sup>, (b) TCNQ, mode at 75 cm<sup>-1</sup> and (c) F<sub>2</sub>-TCNQ mode at 78.5 cm<sup>-1</sup>.

In TCNQ, the mode at  $\sim 40$  cm<sup>-1</sup> contributes only to non-local electron-phonon interaction, while the mode at 75 cm<sup>-1</sup> contributes both to the local and non-local ones (cf. Figures 2 and S4). The mode at  $\sim 78.5$  cm<sup>-1</sup> of F<sub>2</sub>-TCNQ also contributes both to the local and non-local interaction. Accordingly, for the former mode, there is clear correlation between the Raman anisotropy and  $L_i^{mn}$ . On the contrary, for the latter two modes, local electron-phonon interaction obscures this correlation: its contribution to the Raman signal appears to be much larger than for the non-local one. Nevertheless, it is clearly seen that the intensities of the discussed modes are not negligible for  $\theta=90^\circ$ , where we do not expect

the Raman signal from local electron-phonon coupling. We thus attribute the Raman signal from these modes at  $\theta=90^\circ$  to their contribution to non-local electron-phonon coupling, in line with Figure S7.

## References

1. Dovesi, R.; Saunders, V. R.; Roetti, C.; Orlando, R.; Zicovich-Wilson, C. M.; Pascale, F.; Civalleri, B.; Doll, K.; Harrison, N. M.; Bush, I. J.; D'Arco, P.; Llunell, M. *CRYSTAL09 User's Manual*; University of Torino: Torino, 2009.
2. Grimme, S. Semiempirical GGA-type density functional constructed with a long-range dispersion correction. *J. Comput. Chem.* **2006**, *27*, 1787–1799.
3. Vener, M. V.; Medvedev, A. G.; Churakov, A. V.; Prikhodchenko, P. V.; Tripol'skaya, T. A.; Lev, O. H-Bond Network in Amino Acid Cocrystals with H<sub>2</sub>O or H<sub>2</sub>O<sub>2</sub>. The DFT Study of Serine–H<sub>2</sub>O and Serine–H<sub>2</sub>O<sub>2</sub>. *J. Phys. Chem. A* **2011**, *115*, 13657–13663.
4. Katsyuba, S. A.; Vener, M. V.; Zvereva, E. E.; Fei, Z.; Scopelliti, R.; Laurenczy, G.; Yan, N.; Paunescu, E.; Dyson, P. J. How Strong Is Hydrogen Bonding in Ionic Liquids? Combined X-ray Crystallographic, Infrared/Raman Spectroscopic, and Density Functional Theory Study. *J. Phys. Chem. B* **2013**, *117*, 9094–9105.
5. B. Baumeier, J. Kirkpatrick, D. Andrienko, *Phys. Chem. Chem. Phys.*, 2010, *12*, 11103.
6. Y. Li, V. Coropceanu, J.-L. Brédas, in *The WSPC Reference on Organic Electronics: Organic Semiconductors* (Eds. J.-L. Brédas, S. R. Marder), World Scientific: Singapore, 2016; pp. 193–230.
7. L.-F. Ji, J.-X. Fan, S.-F. Zhanga, A.-M. Ren, *Phys. Chem. Chem. Phys.*, 2018, *20*, 3784.
8. V. Coropceanu, J. Cornil, D. A. da Silva Filho, Y. Olivier, R. Silbey, J.-L. Brédas, *Chem. Rev.*, 2007, *107*, 926.
